# Supplementary material for: When Cyclodextrins Met Data Science: Unveiling Their Pharmaceutical Applications through Network Science and Text-Mining
Source: MDPI journal article supplement (doi:10.3390/pharmaceutics13081297), 2021-08-19
Supplement: s1 [file s1]

# Supplementary Material: When Cyclodextrins Met Data Science: Unveiling Their Pharmaceutical Applications through Network Science and Text-Mining

Juliana Rincón-López, Yara C. Almanza-Arjona, Alejandro P. Riascos and Yareli Rojas-Aguirre

**Table S1.** Commercially available CD-based formulations [1–11].

| Trade name                      | Type of CD     | API                               | Administration route/dosage form     | Indication                      | Company                                                 |
|---------------------------------|----------------|-----------------------------------|--------------------------------------|---------------------------------|---------------------------------------------------------|
| <b>Janssen COVID-19 Vaccine</b> | HP $\beta$ CD  | Ad26.COVS-2                       | Suspension for I.M. administration   | Vaccine (COVID-19)              | Janssen Biotech, Inc. (Horsham, Pennsylvania, USA)      |
| <b>Veklury</b>                  | SBE $\beta$ CD | Remdesivir                        | Lyophilized powder for I.V. solution | Antiviral (COVID-19)            | Gilead Sciences, Inc. (Foster City, California, USA)    |
| <b>Trappsol Cyclo</b>           | HP $\beta$ CD  | Cyclodextrin                      | I.V. solution                        | Niemann-Pick Disease Type C     | Cyclo Therapeutics, Inc. (Gainesville, Florida, USA)    |
| <b>Zulresso</b>                 | SBE $\beta$ CD | Brexanolone                       | I.V. solution                        | Postpartum depression           | Sage Therapeutics, Inc. (Cambridge, Massachusetts, USA) |
| <b>Baqsimi</b>                  | $\beta$ CD     | Glucagon                          | Nasal powder                         | Severe hypoglycemia             | Eli Lilly and Company (Indianapolis, Indiana, USA)      |
| <b>Voriconazole</b>             | HP $\beta$ CD  | Voriconazole                      | Lyophilized powder for I.V. solution | Broad spectrum antimycotic      | Xellia Pharmaceuticals ApS (Copenhagen, Denmark)        |
| <b>Pazeo</b>                    | HP $\gamma$ CD | Olopatadine hydrochloride         | Ocular solution                      | Allergic conjunctivitis         | Alcon Research Ltd. (Geneva, Switzerland)               |
| <b>Pansporin T</b>              | $\alpha$ CD    | Cefotiam hexetil hydrochloride    | Oral tablet                          | Antibiotic                      | Takeda Pharmaceutical Co. (Osaka, Japan)                |
| <b>Brexin</b>                   | $\beta$ CD     | Piroxicam                         | Oral tablet                          | Analgesic and anti-inflammatory | Chiesi Pharmaceuticals (Parma, Italy)                   |
| <b>Opalmon</b>                  | $\gamma$ CD    | Limaprost                         | Oral tablet                          | Burger's disease                | Ono Pharmaceutical Co., Ltd. (Osaka, Japan)             |
| <b>Meiact</b>                   | $\beta$ CD     | Cephalosporin                     | Oral tablet                          | Antibiotic                      | Meiji Seika Pharma Co., Ltd. (Tokyo, Japan)             |
| <b>Glymesason</b>               | $\beta$ CD     | Dexamethasone                     | Oral tablet, ointment                | Analgesic and anti-inflammatory | Fujinaga Pharmaceutical Co., Ltd. (Tokyo, Japan)        |
| <b>Yaz</b>                      | $\beta$ CD     | Ethinylestradiol and drospirenone | Oral tablet                          | Contraception                   | Bayer AG (Leverkusen, Germany)                          |
| <b>Mobitil</b>                  | $\beta$ CD     | Meloxicam                         | Oral tablet, rectal suppository      | Non steroid anti-inflammatory   | Medical Union Pharmaceuticals (Cairo, Egypt)            |
| <b>Surgamyl</b>                 | $\beta$ CD     | Tiaprofenic acid                  | Oral tablet                          | Analgesic                       | Roussel-Maestrelli (Paris, France)                      |
| <b>Cicladol</b>                 | $\beta$ CD     | Piroxicam                         | Oral tablet, rectal suppository      | Anti-inflammatory               | Masterpharma (Parma, Italy)                             |
| <b>Lonmiel</b>                  | $\beta$ CD     | Benexate hydrochloride            | Oral capsule                         | Gastric ulcer                   | Negase Medicals Co. (Itami, Japan)                      |
| <b>Omebeta</b>                  | $\beta$ CD     | Omeprazole                        | Oral tablet                          | Gastric ulcer                   | Betapharm (Augsburg, Germany)                           |
| <b>Zyrtec</b>                   | $\beta$ CD     | Cetirizine                        | Chewable tablet                      | Respiratory allergies           | Losan Pharma GmbH (Neuenburg am Rhein, Germany)         |

|                             |                |                                         |                                                      |                                                           |                                                                 |
|-----------------------------|----------------|-----------------------------------------|------------------------------------------------------|-----------------------------------------------------------|-----------------------------------------------------------------|
| <b>Stada-Travel</b>         | $\beta$ CD     | Diphenhydramine and chlorothephyllyne   | Chewable tablet                                      | Travel sickness                                           | Stada Arzneimittel AG (Bad Vilbel, Germany)                     |
| <b>Nicorette</b>            | $\beta$ CD     | Nicotine                                | Sublingual tablet                                    | Abstinence syndrome                                       | Pharmacia Upjohn (Now owned by Pfizer Inc., NYC, New York, USA) |
| <b>Nitrophen</b>            | $\beta$ CD     | Nitroglycerin                           | Sublingual tablet                                    | Coronary dilatator                                        | Nippon Kayaku Co. (Tokyo, Japan)                                |
| <b>Prostarmon E</b>         | $\beta$ CD     | PGE <sub>2</sub>                        | Sublingual tablet                                    | Labor induction                                           | Ono Pharmaceutical Co., Ltd. (Osaka, Japan)                     |
| <b>Mena-Gargle</b>          | $\beta$ CD     | Iodine                                  | Oral solution (Gargling)                             | Throat disinfection                                       | Kyushin pharmaceutical Co., Ltd. (Tokyo, Japan)                 |
| <b>Sporanox</b>             | HP $\beta$ CD  | Itraconazole                            | Oral solution                                        | Antimycotic                                               | Janssen Pharmaceutica (Beerse, Belgium)                         |
| <b>Flogene</b>              | $\beta$ CD     | Piroxicam                               | Oral solution                                        | Analgesic and anti-inflammatory                           | Ache Laboratorios Farmaceuticos S.A. (São Paulo, Brasil)        |
| <b>Nimedex</b>              | $\beta$ CD     | Nimesulide                              | Oral sachet                                          | Non steroid anti-inflammatory                             | Novartis International AG (Basel, Switzerland)                  |
| <b>VFEND</b>                | SBE $\beta$ CD | Voriconazole                            | I.V. solution                                        | Antimycotic                                               | Pfizer, Inc. (NYC, New York, USA)                               |
| <b>Cardiotec</b>            | HP $\gamma$ CD | Tc-99 and Teboroxime                    | I.V. solution                                        | Radioactive imaging                                       | Bracco Group (Milan, Italy)                                     |
| <b>Caverject Dual</b>       | $\alpha$ CD    | Alprostadil                             | Intracavernosal injection                            | Erectile dysfunction                                      | Pfizer, Inc. (NYC, New York, USA)                               |
| <b>MitoExtra</b>            | HP $\beta$ CD  | Mitomycin                               | I.V. solution                                        | Cancer                                                    | Novartis International AG (Basel, Switzerland)                  |
| <b>Prostavasin</b>          | $\alpha$ CD    | PGE <sub>1</sub>                        | Intra-arterial or I.V. solution                      | Chronic arterial occlusive disease                        | Ono Pharmaceutical Co., Ltd. (Osaka, Japan)                     |
| <b>Edex</b>                 | $\alpha$ CD    | PGE <sub>1</sub>                        | Solution for Intracavernosal injection               | Erectile dysfunction                                      | Schwarz PharmaAG (Acquired by UCB pharma, Brussels, Belgium)    |
| <b>Zeldox, Geodon</b>       | SBE $\beta$ CD | Ziprasidone                             | Oral capsule, I.M. solution                          | Schizophrenia                                             | Pfizer, Inc. (NYC, New York, USA)                               |
| <b>Lubion</b>               | HP $\beta$ CD  | Progesterone                            | I.M. solution or solution for subcutaneous injection | Infertility treatment                                     | Hikma Pharmaceuticals (London, UK)                              |
| <b>Indocid</b>              | HP $\beta$ CD  | Indomethacin                            | Ocular solution                                      | Ocular inflammation and cystoid macular edema             | Chauvin Pharmaceuticals Ltd. (London, UK)                       |
| <b>Clorocil</b>             | RM $\beta$ CD  | Chloramphenicol                         | Ocular solution                                      | Antibiotic                                                | Oftalder (Lisboa, Portugal)                                     |
| <b>Voltaren Ophtha</b>      | HP $\gamma$ CD | Diclofenac sodium salt                  | Ocular solution                                      | Non steroid anti-inflammatory                             | Novartis International AG (Basel, Switzerland)                  |
| <b>Aerodiol</b>             | RM $\beta$ CD  | 17 $\beta$ -Estradiol                   | Nasal spray                                          | Hormone therapy                                           | Servier Laboratories (Suresnes, France)                         |
| <b>Coordinax</b>            | $\beta$ CD     | Cisapride                               | Rectal suppository                                   | Gastrointestinal mobility stimulant                       | Janssen Pharmaceutica (Beerse, Belgium)                         |
| <b>Acerap</b>               | $\beta$ CD     | Aceclofenac                             | Tablet                                               | Osteoarthritis, muscular pain, gout, rheumatoid arthritis | Taj Pharma India (Mumbai, India)                                |
| <b>Betahist</b>             | $\beta$ CD     | Betahistine                             | Tablet                                               | Vertigo Ménière's syndrome                                | Geno Pharmaceuticals Pvt. Ltd. (Mapusa, India)                  |
| <b>Transilium</b>           | $\beta$ CD     | Chlordiazepoxide                        | Tablet                                               | Anxiety, neurosis, psychosis                              | Gador (Buenos aires, Argentina)                                 |
| <b>Cold Remedy Soothing</b> | $\beta$ CD     | Chlorpheniramine maleate, acetaminophen | Tablet                                               | Fever, allergies                                          | Foshan Dezhong Pharmaceutical Co. Ltd. (Guangdong, China)       |

|                               |               |                             |                                  |                                                              |                                                                                             |
|-------------------------------|---------------|-----------------------------|----------------------------------|--------------------------------------------------------------|---------------------------------------------------------------------------------------------|
| <b>Natures Aid Vitamin D3</b> | $\beta$ CD    | Cholecalciferol             | Tablet                           | Vitamin D deficiency                                         | Natures Aid (Preston, UK)<br>Synthelabo Pharmaceuticals<br>(Now Sanofi S.A., Paris, France) |
| <b>Rynathisol</b>             | $\beta$ CD    | Dextromethorphan            | Tablet                           | Cough                                                        |                                                                                             |
| <b>Fluner</b>                 | $\beta$ CD    | Flunarizine                 | Tablet                           | Migraine occlusive peripheral vascular disease               | Geno Pharmaceuticals Pvt. Ltd. (Mapusa, India)                                              |
| <b>Entronor-TZ</b>            | $\beta$ CD    | Norfloxacin, tinidazole     | Tablet                           | diarrhea, protozoal infections                               | Sydler (Mumbai, India)                                                                      |
| <b>Cycladol</b>               | $\beta$ CD    | Piroxicam                   | Tablet, suppository, oral powder | Osteoarthritis, rheumatoid arthritis, ankylosing spondylitis | Chiesi Pharmaceuticals (Parma, Italy)                                                       |
| <b>Rofizgel</b>               | $\beta$ CD    | Rofecoxib                   | Tablet                           | Osteoarthritis, rheumatoid arthritis, ankylosing spondylitis | Wockhardt Ltd. (Mumbai, India)                                                              |
| <b>Perindopril Erbumine</b>   | HP $\beta$ CD | Perindopril tert-butylamine | Tablet                           | Hypertension, heart failure and cardiac events prevention    | Sandoz Pharmaceuticals S.A. (Part of Novartis International AG, Basel Switzerland)          |

## References

1. Szejtli, J. Past, Present, and Future of Cyclodextrin Research. *Pure Appl. Chem.* **2004**, *76*, 1825–1845, doi:10.1351/pac200476101825.
2. Loftsson, T.; Brewster, M.E. Pharmaceutical Applications of Cyclodextrins: Basic Science and Product Development. *J. Pharm. Pharmacol.* **2010**, *62*, 1607–1621, doi:10.1111/j.2042-7158.2010.01030.x.
3. Conceição, J.; Adeoye, O.; Cabral-marques, H.M.; Manuel, J.; Lobo, S. Cyclodextrins as Excipients in Tablet Formulations. *Drug Discov. Today* **2018**, *23*, 1274–1284, doi:10.1016/j.drudis.2018.04.009.
4. Fenyvesi, É.; Puskás, I.; Szenté, L. Applications of Steroid Drugs Entrapped in Cyclodextrins. *Environ. Chem. Lett.* **2019**, *17*, 375–391, doi:10.1007/s10311-018-0807-7.
5. Sohajda, T. Cyclo Therapeutics Announces Design of Pivotal Phase 3 Study Evaluating Trappsol® Cyclo™ in Niemann-Pick Type C1 Available online: <https://cyclodextrinnews.com/2021/04/29/cyclo-therapeutics-announces-design-of-pivotal-phase-3-study-evaluating-trappsol-cyclo-in-niemann-pick-type-c1/> (accessed on 7 July 2021).
6. FDA Pazeo (Olopatadine Hydrochloride) Ophthalmic Solution FDA Approval Available online: [https://www.accessdata.fda.gov/drugsatfda\\_docs/nda/2015/206276Orig1s000TOC.cfm](https://www.accessdata.fda.gov/drugsatfda_docs/nda/2015/206276Orig1s000TOC.cfm) (accessed on 12 July 2021).
7. FDA Drug Approval Package: Voriconazole for Injection Available online: [https://www.accessdata.fda.gov/drugsatfda\\_docs/nda/2017/208562Orig1s000TOC.cfm](https://www.accessdata.fda.gov/drugsatfda_docs/nda/2017/208562Orig1s000TOC.cfm) (accessed on 12 July 2021).
8. FDA FDA-Approved Drugs: Baqsimi Available online: <https://www.accessdata.fda.gov/scripts/cder/daf/index.cfm?event=overview.process&ApplNo=210134> (accessed on 12 July 2021).
9. FDA Drug Approval Package: Zulresso Available online: [https://www.accessdata.fda.gov/drugsatfda\\_docs/nda/2019/211371Orig1s000TOC.cfm](https://www.accessdata.fda.gov/drugsatfda_docs/nda/2019/211371Orig1s000TOC.cfm) (accessed on 12 July 2021).
10. FDA COVID-19 Update: FDA Broadens Emergency Use Authorization for Veklury (Remdesivir) to Include All Hospitalized Patients for Treatment of COVID-19 Available online: <https://www.fda.gov/news-events/press-announcements/covid-19-update-fda-broadens-emergency-use-authorization-veklury-remdesivir-include-all-hospitalized> (accessed on 6 July 2021).
11. FDA Janssen COVID-19 Vaccine | FDA Emergency Use Authorization Available online: <https://www.fda.gov/emergency-preparedness-and-response/coronavirus-disease-2019-covid-19/janssen-covid-19-vaccine#additional> (accessed on 6 July 2021).
